# Supplementary material for: Are Sexual Assaults Related to Functional Somatic Disorders? A Cross-Sectional Study
Source: MDPI journal article supplement (doi:10.3390/ijerph20206947), 2023-10-20
Supplement: s1 [file s1]

**Supplementary Digital Files: Are Sexual Assaults related to Functional Somatic Disorders? A cross-sectional study**

**Figure S1: Flow chart of participation from the DanFunD population sample**

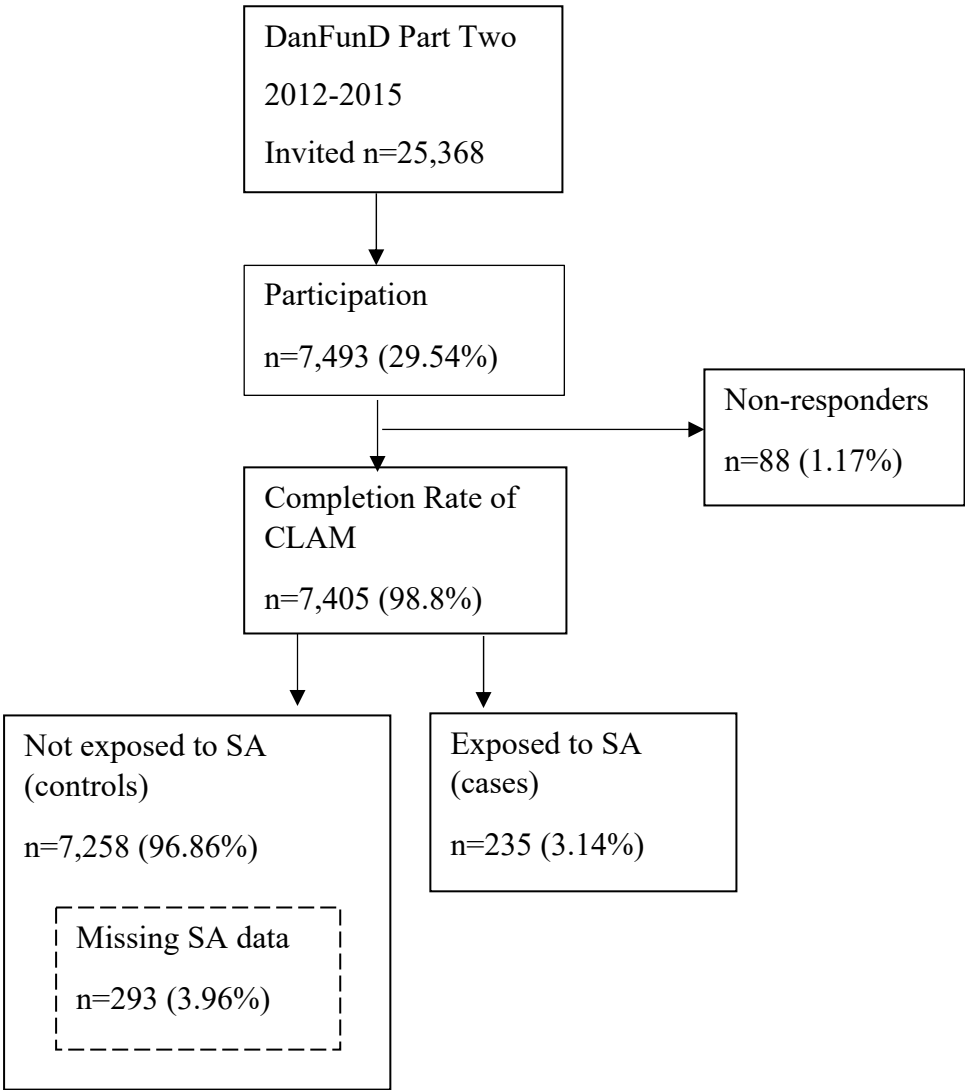

| <b>Table S1, Abbreviations</b> |                                                      |
|--------------------------------|------------------------------------------------------|
| Abbreviations                  | Description                                          |
| SA                             | Sexual Assault                                       |
| FSD                            | Functional Somatic Disorder                          |
| FSS                            | Functional Somatic Syndromes                         |
| CWP                            | Chronic Widespread Pain                              |
| IB                             | Irritable Bowel                                      |
| CF                             | Chronic Fatigue                                      |
| MCS                            | Multiple Chemical Sensitivity                        |
| WAD                            | Whiplash-Associated Disorder                         |
| BDS                            | Bodily Distress Syndrome                             |
| PTSD                           | Post-traumatic Stress Disorder                       |
| DanFunD                        | The Danish Study of Functional Disorders             |
| ISTDP                          | Intensive Short-Term Dynamic Psychotherapy           |
| EAET                           | Emotional Awareness and Expression Therapy           |
| CLAM                           | Cumulative Lifetime Adversity Measure                |
| SCL-8                          | Symptom checklist, derived from the 90-item SCL-90-R |
| CI                             | Confidence interval                                  |
| RR                             | Risk Ratio                                           |
| SSD                            | Somatic Symptom Disorder                             |

| Table S2                                         |                          | Population Characteristics, women       |                                                   |                                   |                           |
|--------------------------------------------------|--------------------------|-----------------------------------------|---------------------------------------------------|-----------------------------------|---------------------------|
| Variables <small>(Measure)</small>               | Categories               | Type of assault                         |                                                   |                                   |                           |
|                                                  |                          | Total<br>Population<br><i>n</i> = 4,037 | Exposed to<br>Sexual<br>Assault<br><i>n</i> = 209 | Subdivisions on Sexual<br>Assault |                           |
|                                                  |                          |                                         |                                                   | Rape<br><i>n</i> = 126            | Groping<br><i>n</i> = 155 |
| Age at inclusion:<br><small>Median (IQR)</small> | Baseline                 | 51.6 (43-62)                            | 50.2 (42-61)                                      | 51.5 (44-62)                      | 49.9 (42-60)              |
| Age at exposure of<br>SA % (n)                   | <5 years                 |                                         | 11.0 (23)                                         | 6.3 (8)                           | 14.8 (23)                 |
|                                                  | 6-11 years               |                                         | 29.2 (61)                                         | 18.3 (23)                         | 33.5 (52)                 |
|                                                  | 12-18 years              |                                         | 39.2 (82)                                         | 38.1 (48)                         | 37.4 (58)                 |
|                                                  | >18 years                |                                         | 20.6 (43)                                         | 37.3 (47)                         | 14.9 (22)                 |
| Vocational training<br>% (n)                     | No education             | 11.4 (459)                              | 12.0 (25)                                         | 17.5 (16)                         | 14.8 (18)                 |
|                                                  | <3 years                 | 20.7 (835)                              | 18.7 (39)                                         | 20.1 (26)                         | 21.5 (32)                 |
|                                                  | 3-4 years                | 43.5 (1757)                             | 35.9 (75)                                         | 38.9 (43)                         | 39.6 (54)                 |
|                                                  | >4 years                 | 21.4 (864)                              | 29.2 (61)                                         | 16.8 (36)                         | 16.8 (44)                 |
|                                                  | <i>Missing 3.0 (122)</i> |                                         |                                                   |                                   |                           |
| Adverse Childhood<br>-environment % (n)          | <i>Missing 1.3 (53)</i>  | 6.4 (260)                               | 9.6 (20)                                          | 8.7 (11)                          | 11.6 (18)                 |
| Physical abuse % (n)                             | <i>Missing 1.2 (47)</i>  | 12.3 (496)                              | 50.7 (106)                                        | 60.3 (76)                         | 54.2 (84)                 |
| Emotional abuse %<br>(n)                         | <i>Missing 3.7 (148)</i> | 7.7 (311)                               | 37.3 (78)                                         | 45.2 (57)                         | 38.7 (60)                 |
| Abuse (physical<br>and/or emotional)<br>% (n)    | <i>Missing 3.7 (148)</i> | 15.8 (636)                              | 61.2 (128)                                        | 69.1 (87)                         | 65.8 (102)                |
| Social Status<br><br><small>Median (IQR)</small> |                          | 7 (6-8)                                 | 6n (5-7)                                          | 6 (5-7)                           | 6 (5-7)                   |
| Emotional distress<br>% (n)                      | <i>Missing 1.5 (60)</i>  | 6.0 (241)                               | 11.5 (24)                                         | 8.7 (13)                          | 10.1 (15)                 |
| Health anxiety % (N)                             | <i>Missing 0.5 (39)</i>  | 6.2 (251)                               | 11.5 (24)                                         | 13.5 (17)                         | 12.3 (19)                 |
| FSD % (n)                                        | Single-organ             | 19.3 (778)                              | 31.6 (66)                                         | 34.1 (43)                         | 29.7 (46)                 |
|                                                  | <i>Missing 2.2 (90)</i>  |                                         |                                                   |                                   |                           |
|                                                  | Multi-organ              | 1.6 (64)                                | 5.7 (12)                                          | 6.4 (8)                           | 7.1 (11)                  |
|                                                  | Missing 20.0<br>(804)    |                                         |                                                   |                                   |                           |

|           |                  |            |           |           |           |
|-----------|------------------|------------|-----------|-----------|-----------|
| FSS % (n) | CWP              | 6.4 (257)  | 9.1 (19)  | 10.3 (13) | 10.3 (16) |
|           | Missing 1.2 (48) |            |           |           |           |
|           | IB               | 4.9 (198)  | 10.1 (21) | 11.9 (15) | 9.0 (14)  |
|           | Missing 2.1 (85) |            |           |           |           |
|           | CF               | 11.7 (473) | 23.9 (50) | 27.8 (35) | 27.1 (42) |
|           | Missing 1.3 (53) |            |           |           |           |
|           | MCS              | 2.6 (104)  | 7.2 (15)  | 7.9 (10)  | 6.5 (10)  |
|           | Missing 1.4 (55) |            |           |           |           |
|           | WAD              | 1.8 (71)   | 4.3 (9)   | 4.8 (6)   | 3.9 (6)   |
|           | Missing 2.0 (82) |            |           |           |           |

*Table S2: SA: sexual Assault; FSD: functional somatic disorder; FSS: functional somatic syndrome; CWP: chronic widespread pain; IB: irritable bowel; CF: chronic fatigue; MCS: multiple chemical sensitivity; WAD: whiplash-associated disorder; IQR: Interquartile range.*

Individuals missing answers on SA items:  $n = 138$

| <b>Table S3</b>                    | <b>Characteristics:<br/>Missing data of SA</b> |                                        |
|------------------------------------|------------------------------------------------|----------------------------------------|
| <b>Variables</b><br>(Measure)      | <b>Categories</b>                              | <b>Missing SA-cases <i>n</i> = 293</b> |
| Age at inclusion: Median (IQR)     | Baseline                                       | 58 (48-66)                             |
| Sex % ( <i>n</i> )                 | Male                                           | 52.90 (155)                            |
|                                    | Female                                         | 47.10 (138)                            |
| Vocational training % ( <i>n</i> ) | No education                                   | 11.95 (35)                             |
|                                    | <3 years                                       | 16.04 (47)                             |
|                                    | 3-4 years                                      | 40.27 (18)                             |
|                                    | >4 years                                       | 26.28 (77)                             |
| Upbringing % ( <i>n</i> )          |                                                | 0 (0)                                  |
| Social Status Median (IQR)         |                                                | 7 (6-8)                                |
| Emotional distress % ( <i>n</i> )  |                                                | 6.83 (20)                              |
| Health anxiety % ( <i>n</i> )      |                                                | 0 (0)                                  |
| Physical abuse % ( <i>n</i> )      |                                                | 0 (0)                                  |
| Emotional abuse % ( <i>n</i> )     |                                                | 2.13 (5)                               |
| Abuse % ( <i>n</i> )               |                                                | 2.13 (5)                               |
| FSD % ( <i>n</i> )                 | Single-organ                                   | 3.63 (46)                              |
|                                    | Multi-organ                                    | 4.76 (4)                               |
| FSS % ( <i>n</i> )                 | CWP                                            | 5.46 (16)                              |
|                                    | IB                                             | 3.41 (10)                              |
|                                    | CF                                             | 8.53 (25)                              |
|                                    | MCS                                            | 2.05 (6)                               |
|                                    | WAD                                            | 1.71 (5)                               |

*Table S3: Abbreviations: SA: sexual assault; FSD: functional somatic disorder; FSS: functional somatic syndrome; CWP: chronic widespread pain; IB: irritable bowel; CF: chronic fatigue; MCS: multiple chemical sensitivity; WAD: whiplash-Associated disorder; SD: standard deviation.*

| Table S4                                           | Symptom severity | Severity;” The past 12 months, have you been bothered by...”<br>% (N), $\chi^2$ |             |           |             |          |
|----------------------------------------------------|------------------|---------------------------------------------------------------------------------|-------------|-----------|-------------|----------|
|                                                    |                  | Not at all                                                                      | A bit       | Somewhat  | Quite a bit | A lot    |
| Cardiopulmonary Symptoms                           |                  |                                                                                 |             |           |             |          |
| <i>Heartpounding P&lt;0.001</i>                    |                  |                                                                                 |             |           |             |          |
| No SA (6930)                                       |                  | 65.3 (4525)                                                                     | 25.7 (1778) | 6.4 (440) | 2.3 (156)   | 0.5 (31) |
| SA (235)                                           |                  | 51.9 (122)                                                                      | 31.5 (74)   | 9.4 (22)  | 6.0 (14)    | 1.9 (3)  |
| Rape (139) * <i>p</i> >0.0001                      |                  | 52.5 (73)                                                                       | 27.3 (38)   | 10.1 (14) | 8.6 (12)    | 1.4 (2)  |
| Groping                                            |                  | 50.3 (90)                                                                       | 33.0 (59)   | 10.1 (18) | 5.6 (10)    | 1.1 (2)  |
| <i>Precordinal discomfort P=0.002</i>              |                  |                                                                                 |             |           |             |          |
| No SA (6919)                                       |                  | 76.6 (5301)                                                                     | 18.2 (1258) | 3.8 (265) | 1.2 (83)    | 0.2 (12) |
| SA (234)                                           |                  | 65.4 (153)                                                                      | 23.5 (55)   | 6.8 (16)  | 3.9 (9)     | 0.4 (1)  |
| Rape (138)                                         |                  | 65.2 (90)                                                                       | 23.9 (33)   | 5.8 (8)   | 4.4 (6)     | 0.7 (1)  |
| Groping (178) * <i>p</i> >0.0001                   |                  | 65.2 (116)                                                                      | 23.0 (41)   | 7.3 (13)  | 3.9 (7)     | 0.6 (1)  |
| <i>Breathlessness without extortion P&lt;0.001</i> |                  |                                                                                 |             |           |             |          |
| No SA (6926)                                       |                  | 73.7 (5102)                                                                     | 18.5 (1281) | 5.5 (380) | 2.0 (136)   | 0.4 (27) |
| SA (234)                                           |                  | 58.1 (136)                                                                      | 25.6 (60)   | 9.4 (22)  | 4.3 (10)    | 2.6 (6)  |
| Rape (139)                                         |                  | 56.8 (79)                                                                       | 23.7 (33)   | 12.2 (17) | 3.6 (5)     | 3.6 (5)  |
| Groping (178)                                      |                  | 55.6 (99)                                                                       | 27.5 (49)   | 9.00 (16) | 5.1 (9)     | 2.8 (5)  |
| <i>Hyperventilation P&lt;0.001</i>                 |                  |                                                                                 |             |           |             |          |
| No SA (6922)                                       |                  | 90.2 (6240)                                                                     | 7.1 (492)   | 2.1 (144) | 0.5 (37)    | 0.1 (9)  |
| SA (233)                                           |                  | 77.3 (180)                                                                      | 14.2 (33)   | 6.4 (15)  | 1.7 (4)     | 0.4 (1)  |
| Rape (138)                                         |                  | 72.5 (100)                                                                      | 17.4 (24)   | 7.3 (10)  | 2.2 (3)     | 0.7 (1)  |
| Groping (177)                                      |                  | 78.5 (139)                                                                      | 12.4 (22)   | 6.8 (12)  | 2.3 (4)     | -        |
| <i>Hot or cold sweats P&lt;0.001</i>               |                  |                                                                                 |             |           |             |          |
| No SA (6910)                                       |                  | 67.6 (4672)                                                                     | 22.1 (1526) | 6.5 (449) | 3.1 (217)   | 0.7 (46) |
| SA (233)                                           |                  | 53.2 (124)                                                                      | 23.6 (55)   | 14.6 (34) | 7.7 (18)    | 0.9 (2)  |
| Rape (137)                                         |                  | 53.3 (73)                                                                       | 24.1 (33)   | 13.1 (18) | 8.0 (11)    | 1.5 (2)  |
| Groping (177)                                      |                  | 50.3 (89)                                                                       | 28.3 (50)   | 15.3 (27) | 6.2 (11)    | -        |
| <i>Dry Mouth P&lt;0.001</i>                        |                  |                                                                                 |             |           |             |          |
| No SA (6912)                                       |                  | 71.9 (4972)                                                                     | 19.6 (1356) | 5.0 (338) | 2.8 (190)   | 0.8 (56) |
| SA (235)                                           |                  | 56.6 (133)                                                                      | 31.9 (75)   | 5.5 (13)  | 3.8 (9)     | 2.1 (5)  |
| Rape (139)                                         |                  | 57.6 (80)                                                                       | 29.5 (41)   | 4.3 (6)   | 5.8 (8)     | 2.9 (4)  |
| Groping (179)                                      |                  | 52.5 (94)                                                                       | 34.1 (61)   | 5.6 (10)  | 5.0 (9)     | 2.8 (5)  |
| Gastrointestinal symptoms                          |                  |                                                                                 |             |           |             |          |
| <i>Frequent loose bowel movements P=0.002</i>      |                  |                                                                                 |             |           |             |          |
| No SA (6924)                                       |                  | 55.1 (3814)                                                                     | 31.1 (2154) | 9.0 (623) | 4.0 (276)   | 0.8 (57) |
| SA (234)                                           |                  | 47.0 (110)                                                                      | 32.9 (77)   | 8.6 (20)  | 9.8 (23)    | 1.7 (4)  |
| Rape (138)                                         |                  | 43.5 (60)                                                                       | 33.3 (46)   | 10.9 (15) | 10.9 (15)   | 1.5 (2)  |
| Groping (178) * <i>p</i> =0.003                    |                  | 47.2 (84)                                                                       | 32.6 (58)   | 8.4 (15)  | 10.1 (18)   | 1.7 (3)  |
| <i>Abdominal pain P&lt;0.001</i>                   |                  |                                                                                 |             |           |             |          |
| No SA (6897)                                       |                  | 64.2 (4429)                                                                     | 26.6 (1834) | 6.2 (430) | 2.5 (171)   | 0.5 (33) |

|                                                                     |             |             |             |           |           |
|---------------------------------------------------------------------|-------------|-------------|-------------|-----------|-----------|
| SA (233)                                                            | 45.9 (107)  | 33.9 (79)   | 12.0 (28)   | 7.7 (18)  | 0.4 (1)   |
| Rape (139)                                                          | 44.6 (62)   | 33.1 (46)   | 12.2 (17)   | 9.4 (13)  | 0.7 (1)   |
| Groping (177)                                                       | 47.5 (84)   | 33.9 (60)   | 11.3 (20)   | 7.3 (13)  | -         |
| <b><i>Feeling bloated P&lt;0.001</i></b>                            |             |             |             |           |           |
| No SA (6917)                                                        | 49.8 (3445) | 33.5 (2317) | 10.3 (715)  | 5.2 (360) | 1.2 (80)  |
| SA (235)                                                            | 28.9 (68)   | 38.7 (91)   | 17.9 (42)   | 11.5 (27) | 3.0 (7)   |
| Rape (139)                                                          | 26.6 (37)   | 38.9 (54)   | 18.0 (25)   | 12.2 (17) | 4.3 (6)   |
| Groping (179)                                                       | 29.1 (52)   | 40.2 (72)   | 17.9 (32)   | 10.1 (18) | 2.8 (5)   |
| <b><i>Diarrhoea P&lt;0.001</i></b>                                  |             |             |             |           |           |
| No SA (6921)                                                        | 73.2 (5066) | 21.8 (1506) | 3.6 (246)   | 1.1 (74)  | 0.4 (29)  |
| SA (235)                                                            | 60.4 (142)  | 27.2 (64)   | 8.1 (19)    | 3.8 (9)   | 0.4 (1)   |
| Rape (139)                                                          | 58.3 (81)   | 28.1 (39)   | 9.4 (13)    | 4.3 (6)   | -         |
| Groping (179)                                                       | 60.9 (109)  | 27.9 (50)   | 6.7 (12)    | 3.9 (7)   | 0.6 (1)   |
| <b><i>Regurgitations P&lt;0.001</i></b>                             |             |             |             |           |           |
| No SA (6895)                                                        | 64.8 (4469) | 25.4 (1753) | 6.5 (450)   | 2.6 (178) | 0.7 (45)  |
| SA (233)                                                            | 53.2 (124)  | 33.5 (78)   | 8.6 (20)    | 4.7 (11)  | -         |
| Rape (138)                                                          | 48.6 (67)   | 34.1 (47)   | 11.6 (16)   | 5.8 (8)   |           |
| Groping (178)                                                       | 54.5 (97)   | 33.2 (59)   | 8.4 (15)    | 3.9 (7)   |           |
| <b><i>Nausea P&lt;0.001</i></b>                                     |             |             |             |           |           |
| No SA (6935)                                                        | 79.3 (5499) | 16.9 (1172) | 2.7 (189)   | 0.9 (64)  | 0.2 (11)  |
| SA (235)                                                            | 62.1 (146)  | 25.1 (59)   | 8.1 (19)    | 3.8 (9)   | 0.9 (2)   |
| Rape (139)                                                          | 59.0 (82)   | 26.6 (37)   | 8.6 (12)    | 4.3 (6)   | 1.4 (2)   |
| Groping (179)                                                       | 62.0 (111)  | 25.1 (45)   | 8.9 (16)    | 3.4 (6)   | 0.6 (1)   |
| <b><i>Burning sensation in upper part of stomach P&lt;0.001</i></b> |             |             |             |           |           |
| No SA (6934)                                                        | 76.8 (5328) | 15.7 (1089) | 4.9 (341)   | 2.1 (147) | 0.4 (29)  |
| SA (232)                                                            | 64.7 (150)  | 21.1 (49)   | 7.8 (18)    | 5.6 (13)  | 0.9 (2)   |
| Rape (136)                                                          | 60.3 (82)   | 22.1 (30)   | 9.6 (13)    | 6.6 (9)   | 1.5 (2)   |
| Groping (179)                                                       | 65.4 (117)  | 21.2 (38)   | 7.8 (14)    | 5.0 (9)   | 0.6 (1)   |
| <b>Musculoskeletal symptoms</b>                                     |             |             |             |           |           |
| <b><i>Pains in arms or legs P&lt;0.001</i></b>                      |             |             |             |           |           |
| No SA (6925)                                                        | 49.4 (3421) | 26.9 (1865) | 13.0 (902)  | 8.1 (565) | 2.5 (172) |
| SA (235)                                                            | 33.6 (79)   | 23.0 (54)   | 22.1 (52)   | 14.8 (34) | 6.8 (16)  |
| Rape (139)                                                          | 30.2 (42)   | 22.3 (31)   | 20.9 (29)   | 17.3 (24) | 9.4 (13)  |
| Groping (179)                                                       | 34.1 (61)   | 23.5 (42)   | 20.7 (37)   | 15.1 (27) | 6.7 (12)  |
| <b><i>Muscular aches or pain P&lt;0.001</i></b>                     |             |             |             |           |           |
| No SA (6907)                                                        | 37.6 (2599) | 38.0 (2622) | 14.7 (1014) | 8.0 (549) | 1.8 (123) |
| SA (234)                                                            | 28.2 (66)   | 30.8 (72)   | 21.4 (50)   | 13.7 (32) | 6.0 (14)  |
| Rape (139)                                                          | 24.5 (34)   | 30.2 (42)   | 23.0 (32)   | 13.7 (19) | 8.6 (12)  |
| Groping (179)                                                       | 29.2 (52)   | 29.8 (53)   | 20.2 (36)   | 14.6 (26) | 6.2 (11)  |
| <b><i>Pains in the joints P&lt;0.001</i></b>                        |             |             |             |           |           |
| No SA (6880)                                                        | 44.0 (3024) | 30.4 (2088) | 14.5 (997)  | 9.1 (627) | 2.1 (144) |
| SA (231)                                                            | 32.5 (75)   | 26.4 (61)   | 19.1 (44)   | 14.7 (34) | 7.4 (17)  |
| Rape (138)                                                          | 29.7 (41)   | 26.8 (37)   | 18.1 (25)   | 15.2 (21) | 10.1 (14) |

|                                                                     |             |             |             |           |           |
|---------------------------------------------------------------------|-------------|-------------|-------------|-----------|-----------|
| Groping (175)                                                       | 30.3 (53)   | 28.0 (49)   | 19.4 (34)   | 14.9 (26) | 7.4 (13)  |
| <b><i>Feeling of paresis or localized weakness P&lt;0.001</i></b>   |             |             |             |           |           |
| No SA (6897)                                                        | 89.2 (6155) | 6.7 (459)   | 2.4 (162)   | 1.3 (87)  | 0.5 (34)  |
| SA (229)                                                            | 81.2 (186)  | 9.2 (21)    | 5.7 (13)    | 2.2 (5)   | 1.8 (4)   |
| Rape (134)                                                          | 76.1(102)   | 9.7 (13)    | 8.2 (11)    | 3.0 (4)   | 3.0 (4)   |
| Groping (175) <i>P</i> =0.003                                       | 80.6 (141)  | 10.3 (18)   | 5.1 (9)     | 2.3 (4)   | 1.7 (3)   |
| <b><i>Backache P&lt;0.001</i></b>                                   |             |             |             |           |           |
| No SA (6905)                                                        | 39.6 (2737) | 33.9 (2342) | 15.3 (1059) | 8.4 (583) | 2.7 (184) |
| SA (232)                                                            | 31.5 (73)   | 33.2 (77)   | 14.7 (34)   | 15.1 (35) | 5.6 (13)  |
| Rape (137) <i>P</i> =0.005                                          | 32.1 (44)   | 33.6 (46)   | 12.4 (17)   | 16.1 (22) | 5.8 (8)   |
| Groping (176) <i>P</i> =0.001                                       | 31.8 (56)   | 35.2 (62)   | 11.9 (21)   | 13.6 (24) | 7.4 (13)  |
| <b><i>Pain moving from one place to another P&lt;0.001</i></b>      |             |             |             |           |           |
| No SA (6904)                                                        | 83.0 (5728) | 10.1 (694)  | 4.1 (284)   | 2.0 (139) | 0.9 (59)  |
| SA (233)                                                            | 72.5 (169)  | 15.9 (37)   | 5.6 (13)    | 3.9 (9)   | 2.1 (5)   |
| Rape (139)                                                          | 69.1 (96)   | 16.6 (23)   | 7.2 (10)    | 3.6 (5)   | 3.6 (5)   |
| Groping (179) <i>P</i> =0.007                                       | 74.0 (131)  | 13.6 (24)   | 6.2 (11)    | 3.4 (6)   | 2.8 (5)   |
| <b><i>Unpleasant numbness or tingling sensations P&lt;0.001</i></b> |             |             |             |           |           |
| No SA (6910)                                                        | 83.5 (5771) | 10.2 (706)  | 3.6 (248)   | 2.0 (135) | 0.7 (50)  |
| SA (235)                                                            | 69.8 (164)  | 14.0 (33)   | 6.8 (16)    | 8.0 (19)  | 1.3 (3)   |
| Rape (139)                                                          | 71.2 (99)   | 11.5 (16)   | 7.2 (10)    | 8.6 (12)  | 1.4 (2)   |
| Groping (179)                                                       | 66.5 (119)  | 16.2 (29)   | 7.3 (13)    | 8.9 (16)  | 1.1 (2)   |
| <b>General Symptoms</b>                                             |             |             |             |           |           |
| <b><i>Concentration difficulties P&lt;0.001</i></b>                 |             |             |             |           |           |
| No SA (6945)                                                        | 55.1 (3824) | 32.6 (2262) | 8.4 (585)   | 3.0 (211) | 0.9 (63)  |
| SA (235)                                                            | 30.6 (72)   | 35.3 (83)   | 21.3 (50)   | 8.5 (20)  | 4.3 (10)  |
| Rape (139)                                                          | 28.1 (39)   | 35.3 (49)   | 21.6 (30)   | 12.2 (17) | 2.9 (4)   |
| Groping (179)                                                       | 29.1 (52)   | 36.9 (66)   | 20.7 (37)   | 8.4 (15)  | 5.0 (9)   |
| <b><i>Excessive fatigue P&lt;0.001</i></b>                          |             |             |             |           |           |
| No SA (6949)                                                        | 30.3 (2102) | 42.1 (2930) | 16.5 (3)    | 8.4 (586) | 2.7 (185) |
| SA (235)                                                            | 18.3 (43)   | 29.4 (69)   | 28.5 (67)   | 16.6 (39) | 7.2 (17)  |
| Rape (139)                                                          | 15.8 (22)   | 30.2 (42)   | 25.2 (35)   | 21.6 (30) | 7.2 (10)  |
| Groping (179)                                                       | 19.6 (35)   | 27.4 (49)   | 27.4 (49)   | 16.8 (30) | 8.9 (16)  |
| <b><i>Headache P&lt;0.001</i></b>                                   |             |             |             |           |           |
| No SA (6940)                                                        | 53.5 (3713) | 32.2 (2233) | 8.9 (619)   | 4.1 (283) | 1.3 (92)  |
| SA (235)                                                            | 34.9 (82)   | 37.0 (87)   | 15.3 (36)   | 9.4 (22)  | 3.4 (8)   |
| Rape (139)                                                          | 34.5 (48)   | 36.0 (50)   | 14.4 (20)   | 11.0 (15) | 4.3 (6)   |
| Groping (179)                                                       | 32.4 (58)   | 39.7 (71)   | 14.0 (25)   | 10.1 (18) | 3.9 (7)   |
| <b><i>Impairment of memory P&lt;0.001</i></b>                       |             |             |             |           |           |
| No SA (6949)                                                        | 56.7 (3942) | 31.6 (2193) | 7.8 (541)   | 3.0 (205) | 1.0 (68)  |
| SA (235)                                                            | 34.8 (81)   | 37.0 (87)   | 12.8 (30)   | 11.1 (26) | 4.7 (11)  |
| Rape (139)                                                          | 30.2 (42)   | 39.6 (55)   | 11.5 (16)   | 13.7 (19) | 5.0 (7)   |
| Groping (179)                                                       | 34.6 (62)   | 35.2 (63)   | 12.9 (23)   | 11.7 (21) | 5.6 (10)  |

***Dizzines  $P<0.001$***

|               |             |             |           |           |          |
|---------------|-------------|-------------|-----------|-----------|----------|
| No SA (6942)  | 72.9 (5061) | 20.4 (1418) | 4.5 (310) | 1.9 (132) | 0.3 (21) |
| SA (235)      | 54.9 (129)  | 31.5 (74)   | 9.8 (23)  | 3.0 (7)   | 0.9 (2)  |
| Rape (139)    | 48.2 (67)   | 37.4 (52)   | 11.5 (16) | 2.9 (4)   | -        |
| Groping (179) | 55.3 (99)   | 30.7 (55)   | 8.9 (16)  | 3.9 (7)   | 1.1 (2)  |

| Table S5     |                | Associations between FSD and sexual assault divided into rape and groping and both |         |             |            |         |                         |            |         |                |           |         |             |            |         |                         |             |         |
|--------------|----------------|------------------------------------------------------------------------------------|---------|-------------|------------|---------|-------------------------|------------|---------|----------------|-----------|---------|-------------|------------|---------|-------------------------|-------------|---------|
| FSD Cases    | Crude          |                                                                                    |         |             |            |         |                         |            |         | Adjusted*      |           |         |             |            |         |                         |             |         |
|              | Groping (n=96) |                                                                                    |         | Rape (n=56) |            |         | Groping and Rape (n=83) |            |         | Groping (n=96) |           |         | Rape (n=56) |            |         | Groping and Rape (n=83) |             |         |
|              | RR             | 95% CI                                                                             | P-Value | RR          | 95% CI     | P-Value | RR                      | 95%CI      | P-Value | RR             | 95% CI    | P-Value | RR          | 95% CI     | P-Value | RR                      | 95% CI      | P-Value |
| Single-organ | 1.68           | 1.18-2.37                                                                          | 0.004   | 2.33        | 1.64-3.33  | >0.001  | 2.31                    | 1.70-3.14  | >0.001  | 1.24           | 0.85-1.81 | 0.270   | 2.02        | 1.38-2.95  | >0.001  | 1.50                    | 1.07-2.09   | 0.018   |
| Multi-organ  | 4.87           | 1.82-12.99                                                                         | 0.002   | 2.43        | 0.34-17.06 | 0.371   | 12.52                   | 6.31-24.82 | >0.001  | 1.44           | 0.36-5.71 | 0.607   | 1.92        | 0.28-13.34 | 0.508   | 6.26                    | 3.25-12.06  | >0.001  |
| FSS Cases    |                |                                                                                    |         |             |            |         |                         |            |         |                |           |         |             |            |         |                         |             |         |
| CWP          | 1.41           | 0.65-3.09                                                                          | 0.388   | 1.21        | 0.40-3.66  | 0.736   | 3.03                    | 1.73-5.31  | >0.001  | 1.67           | 0.57-2.39 | 0.673   | 1.00        | 0.34-3.00  | 0.995   | 1.53                    | 0.84-2.78   | 0.163   |
| IB           | 1.80           | 0.82-3.94                                                                          | 0.142   | 3.67        | 1.82-7.41  | >0.001  | 3.28                    | 1.75-6.15  | >0.001  | 1.16           | 0.49-2.75 | 0.729   | 2.92        | 1.45-5.88  | 0.003   | 2.36                    | 1.26-4.40   | 0.007   |
| CF           | 1.76           | 1.10-2.82                                                                          | 0.018   | 1.61        | 0.84-3.07  | 0.148   | 4.08                    | 3.03-5.48  | >0.001  | 1.29           | 0.80-2.10 | 0.299   | 1.46        | 0.78-2.72  | 0.234   | 2.50                    | 1.87-3.34   | >0.001  |
| MCS          | 2.69           | 1.13-6.42                                                                          | 0.026   | 4.61        | 1.97-10.83 | <0.001  | 4.47                    | 2.16-9.25  | >0.001  | 2.07           | 0.78-5.49 | 0.144   | 4.56        | 1.93-10.79 | 0.001   | 3.16                    | 1.42-7.00   | 0.005   |
| WAD-         | 2.74           | 1.03-7.30                                                                          | 0.043   | 3.56        | 1.16-10.86 | 0.026   | 3.26                    | 1.23-8.63  | 0.017   | 1.98           | 0.63-6.15 | 0.238   | 3.55        | 1.16-10.91 | 0.027   | 2.76                    | (1.02-7.43) | 0.044   |

Table S5: \*Adjusted for age at inclusion, sex, social status, vocational training, adverse childhood environment. Abbreviations: RR: risk ratio; SA: sexual assault; FSD: functional somatic disorders; BDS: bodily distress syndrome; FSS: functional somatic syndrome; CWP: chronic widespread pain; IB: irritable bowel; CF: chronic fatigue; MCS: multiple chemical sensitivity; WAD: whiplash-associated disorder.
